# Supplementary material
Source: PubMed Central journal article supplement (PMC2698588)
Supplement: jlb.1108710_1.pdf [file jlb.1108710_1.pdf]

|                            |                                     |                                                                                     |                     |                                                                         |
|----------------------------|-------------------------------------|-------------------------------------------------------------------------------------|---------------------|-------------------------------------------------------------------------|
| HG-U133A_2HF14545          | Symbol                              | RefSeq                                                                              | Entrez              | Affymetrix probe set                                                    |
| LOC283116.LOC653111.TRIM49 | LOC283116.LOC653111.TRIM49          | NM_020358.2:XM_208043.4:XM_926073.2                                                 | 283116:57093:653111 | 221154_at                                                               |
| HG-U133A_2HF1732           | NARG1L                              | NM_018527.2                                                                         | 79612               | 220556_at                                                               |
| HG-U133A_2HF7265           | IF127                               | NM_005532.3                                                                         | 3429                | 202411_at                                                               |
| HG-U133A_2HF10667          | FN1                                 | NM_002026.2:NM_212474.1:NM_212475.1:NM_212476.1:NM_212478.1:NM_212482.1             | 2335                | 210495_x_at:211719_x_at:212464_s_at:216442_x_at                         |
| HG-U133A_2HF2538           | EDNRB                               | NM_000115.1                                                                         | 1910                | 204271_s_at:204273_at                                                   |
| HG-U133A_2HF10390          | SLC7A11                             | NM_014331.3                                                                         | 23657               | 207528_s_at:209921_at:217618_x_at:217678_at                             |
| HG-U133A_2HF1460           | SYN1                                | NM_002090.2                                                                         | 2921                | 207850_at                                                               |
| HG-U133A_2HF8544           | LOC732415.NMMP19                    | NM_002429.4:XM_001133377.1                                                          | 4327:732415         | 204575_s_at                                                             |
| HG-U133A_2HF10199          | TFPI                                | NM_006287.4                                                                         | 7035                | 209676_at:213258_at                                                     |
| HG-U133A_2HF17955          | TFPI                                | NM_001032281.2                                                                      | 7035                | 210665_at                                                               |
| HG-U133A_2HF15994          | EDNRB                               | NM_000115.1:NM_003991.1                                                             | 1910                | 206701_x_at                                                             |
| HG-U133A_2HF15630          | CDY1.CDY1B                          | NM_001003895.1:NM_004680.2                                                          | 253175:9085         | 207647_at                                                               |
| HG-U133A_2HF6504           | SYN1                                | NM_006950.3:NM_133499.2                                                             | 6853                | 221914_at                                                               |
| HG-U133A_2HF13610          | DOCK4                               | NM_014705.3                                                                         | 9732                | 205003_at                                                               |
| HG-U133A_2HF6636           | SPP1                                | NM_00582.2:NM_001040058.1:NM_001040060.1                                            | 6696                | 209875_s_at                                                             |
| HG-U133A_2HF1735           | TFPI                                | NM_001032281.2:NM_006287.4                                                          | 7035                | 210664_s_at                                                             |
| HG-U133A_2HF7046           | HEY1                                | NM_001040708.1:NM_012258.3                                                          | 23462               | 218839_at:44783_s_at                                                    |
| HG-U133A_2HF2670           | DFB                                 | NM_005259.1                                                                         | 2640                | 207145_at                                                               |
| HG-U133A_2HF1001           | CXCL1                               | NM_001511.1                                                                         | 2919                | 204470_at                                                               |
| HG-U133A_2HF1086           | PPARG                               | NM_005037.5:NM_015869.4:NM_138711.3                                                 | 5468                | 208510_s_at                                                             |
| HG-U133A_2HF3704           | C6orf103.LOC731836+729176.LOC729176 | XM_929679.2:XM_941958.2:XR_015824.1+XR_015941.1                                     | 731836:79747        | 220614_s_at                                                             |
| HG-U133A_2HF8778           | LOC148198                           | XM_047554.11                                                                        | 148198              | 215532_x_at                                                             |
| HG-U133A_2HF742            | CTS2                                | NM_001333.2                                                                         | 1513                | 210074_at                                                               |
| HG-U133A_2HF14284          | IL1R1                               | NM_000877.2                                                                         | 3554                | 202948_at:215182_x_at:215561_s_at                                       |
| HG-U133A_2HF17042          | RFPL1                               | NM_021026.1                                                                         | 5988                | 207934_at                                                               |
| HG-U133A_2HF2823           | CCL7                                | NM_006273.2                                                                         | 6354                | 208075_s_at                                                             |
| HG-U133A_2HF11652          | WNT5A                               | NM_003392.3                                                                         | 7474                | 205990_s_at:213425_at                                                   |
| HG-U133A_2HF14511          | SEM                                 | NM_005261.2:NM_181702.1                                                             | 2649                | 204472_at                                                               |
| HG-U133A_2HF17570          | ARG1                                | NM_00045.2                                                                          | 383                 | 206177_s_at                                                             |
| HG-U133A_2HF3630           | MS4A4A                              | NM_024021.2:NM_148975.1                                                             | 51338               | 219607_s_at                                                             |
| HG-U133A_2HF13890          | EREG                                | NM_001432.2                                                                         | 2069                | 205767_at                                                               |
| HG-U133A_2HF2203           | IL1RAP                              | NM_134470.2                                                                         | 3556                | 210233_at                                                               |
| HG-U133A_2HF3825           | PRR16                               | NM_016644.1                                                                         | 51334               | 220014_at                                                               |
| HG-U133A_2HF390            | CXCR7                               | NM_001047841.1:NM_020311.2                                                          | 57007               | 212977_at                                                               |
| HG-U133A_2HF2087           | BCAT1                               | NM_005504.4                                                                         | 586                 | 214390_s_at:214452_at                                                   |
| HG-U133A_2HF5573           | IGF2BP3                             | NM_006547.2                                                                         | 10643               | 203819_s_at:203820_s_at                                                 |
| HG-U133A_2HF7452           | TPST1                               | NM_003596.2                                                                         | 8460                | 204140_at                                                               |
| HG-U133A_2HF6361           | PCDH2B.PCDH2B3                      | NM_018936.2:NM_018937.2                                                             | 56132:56133         | 221410_x_at                                                             |
| HG-U133A_2HF1527           | TMEM65A                             | NM_019804.1                                                                         | 55076               | 219410_at                                                               |
| HG-U133A_2HF11038          | TMEM158                             | NM_015444.2                                                                         | 25907               | 213338_at                                                               |
| HG-U133A_2HF14477          | MET                                 | NM_000245.2                                                                         | 4233                | 203510_at:211599_x_at:213807_x_at:213816_s_at                           |
| HG-U133A_2HF11743          | OLR1                                | NM_002543.3                                                                         | 4973                | 210004_at                                                               |
| HG-U133A_2HF16895          | IGF2BP3.LOC645468.LOC651107         | NM_006547.2:XR_017635.1:XR_019484.1                                                 | 10643:645468:651107 | 203819_x_at:216493_s_at:216494_at                                       |
| HG-U133A_2HF1499           | C12orf12                            | NM_015991.2                                                                         | 712                 | 218232_at                                                               |
| HG-U133A_2HF1110           | PLEKHC1                             | NM_006832.1                                                                         | 10979               | 209209_s_at:209210_s_at:214212_x_at                                     |
| HG-U133A_2HF14917          | GPR97                               | NM_170776.3                                                                         | 222487              | 220404_at                                                               |
| HG-U133A_2HF16205          | SPRY2                               | NM_005842.2                                                                         | 10253               | 204011_at                                                               |
| HG-U133A_2HF15253          | SDCC2                               | NM_002998.3                                                                         | 6383                | 212154_at:212157_at:212158_at                                           |
| HG-U133A_2HF1569           | CXCL6                               | NM_002993.2                                                                         | 6372                | 206336_at                                                               |
| HG-U133A_2HF8484           | ASPH                                | NM_020164.2:NM_032467.1                                                             | 444                 | 207284_s_at                                                             |
| HG-U133A_2HF16986          | ANXA3                               | NM_005139.2                                                                         | 306                 | 209369_at                                                               |
| HG-U133A_2HF7363           | SERPIN2                             | NM_002575.1                                                                         | 5055                | 204614_at                                                               |
| HG-U133A_2HF948            | PDE2A                               | NM_002599.1                                                                         | 5138                | 204134_at                                                               |
| HG-U133A_2HF1944           | TFPI2                               | NM_006528.2                                                                         | 7980                | 209277_at:209278_s_at                                                   |
| HG-U133A_2HF10652          | AIK1.BAIAP2                         | NM_001080395.1:NM_017451.1                                                          | 10458:9625          | 205986_at:207832_at                                                     |
| HG-U133A_2HF18092          | SPRED2                              | NM_181784.1                                                                         | 200734              | 212458_at:212466_at:214026_s_at                                         |
| HG-U133A_2HF5630           | THBS1                               | NM_003246.2                                                                         | 7057                | 201107_s_at:201108_s_at:201109_s_at                                     |
| HG-U133A_2HF16333          | TYRP1                               | NM_000550.1                                                                         | 7306                | 205694_at                                                               |
| HG-U133A_2HF15699          | LRRP1                               | NM_013437.2                                                                         | 29967               | 219631_at:220253_s_at:220254_at                                         |
| HG-U133A_2HF1794           | TRAF1                               | NM_020182.3:NM_199169.1:NM_199170.1:NM_199171.1                                     | 56737               | 217875_s_at                                                             |
| HG-U133A_2HF7836           | SLC2A5                              | NM_003039.1                                                                         | 6518                | 204429_s_at:204430_s_at                                                 |
| HG-U133A_2HF55             | CD9                                 | NM_001769.2                                                                         | 928                 | 201005_at                                                               |
| HG-U133A_2HF5935           | ENG                                 | NM_000118.1                                                                         | 2022                | 201808_s_at:201809_s_at                                                 |
| HG-U133A_2HF174            | VLDR                                | NM_001018056.1:NM_003383.3                                                          | 7436                | 209822_s_at                                                             |
| HG-U133A_2HF1761           | ANKRD57                             | NM_023016.3                                                                         | 65124               | 219496_at                                                               |
| HG-U133A_2HF13017          | PHLDA1                              | NM_007350.3                                                                         | 22822               | 217996_at:217997_at:217998_at:217999_s_at:218000_s_at                   |
| HG-U133A_2HF8279           | IL1R2                               | NM_004633.3:NM_173343.1                                                             | 7850                | 205403_at:211372_s_at                                                   |
| HG-U133A_2HF15301          | CCL2                                | NM_002982.3                                                                         | 6347                | 216598_s_at                                                             |
| HG-U133A_2HF13977          | MERTK                               | NM_006343.2                                                                         | 10461               | 206028_s_at:211913_s_at                                                 |
| HG-U133A_2HF18222          | CTS1                                | NM_001912.3:NM_145918.2                                                             | 202097_s_at         | 202097_s_at                                                             |
| HG-U133A_2HF2126           | TGM2                                | NM_004613.2:NM_198951.1                                                             | 7052                | 211003_x_at:211573_x_at                                                 |
| HG-U133A_2HF16350          | SLCO4A1                             | NM_016354.3                                                                         | 28231               | 219911_s_at                                                             |
| HG-U133A_2HF1183           | CXCL5                               | NM_002994.3                                                                         | 6374                | 207852_at:214974_x_at:215101_s_at                                       |
| HG-U133A_2HF9068           | HIST1H4H                            | NM_003543.3                                                                         | 8365                | 208180_s_at                                                             |
| HG-U133A_2HF1113           | TRAF1                               | NM_001008530.1:NM_005056.5                                                          | 5541                | 201212_at                                                               |
| HG-U133A_2HF1994           | SEMA6B                              | NM_002421.2:NM_032108.2:NM_133327.1                                                 | 10501               | 220778_x_at                                                             |
| HG-U133A_2HF10953          | AREG.LOC727738                      | NM_001657.2:XM_001125684.1                                                          | 374:727738          | 205239_at                                                               |
| HG-U133A_2HF7105           | CE1.LOC652708                       | NM_001025194.1:NM_001025195.1:NM_001266.4:XM_942326.2                               | 1066:652708         | 209616_s_at                                                             |
| HG-U133A_2HF2809           | CXCL2                               | NM_002089.2                                                                         | 2920                | 209774_x_at                                                             |
| HG-U133A_2HF18222          | RAB13                               | NM_002870.2                                                                         | 5872                | 202252_at                                                               |
| HG-U133A_2HF5048           | SH3BP1.CSHL1                        | NM_001117.3:NM_001318.2:NM_022579.1:NM_022580.1:NM_022581.1:NM_022640.2:NM_022641.2 | 1442:1444           | 209959_s_at:207285_x_at:208293_x_at:208294_x_at:208295_x_at:208356_x_at |
| HG-U133A_2HF94             | PPAP2B                              | NM_003713.3:NM_177414.1                                                             | 8016                | 209355_s_at:212226_s_at:212230_at                                       |
| HG-U133A_2HF1209           | THBD                                | NM_000361.2                                                                         | 7653                | 203887_s_at:203888_at                                                   |
| HG-U133A_2HF3075           | AVP11                               | NM_021732.1                                                                         | 6030                | 218631_at                                                               |
| HG-U133A_2HF17686          | EPYC                                | NM_004950.3                                                                         | 18373               | 206439_at                                                               |
| HG-U133A_2HF1569           | RAI14                               | NM_015577.1                                                                         | 2604                | 202025_s_at                                                             |
| HG-U133A_2HF15845          | FCAR                                | NM_133279.1:NM_133280.1                                                             | 2204                | 211305_x_at:211306_s_at                                                 |
| HG-U133A_2HF1679           | GPX3                                | NM_002084.3                                                                         | 2878                | 201348_at:214091_s_at                                                   |
| HG-U133A_2HF6178           | C1QB                                | NM_000491.3                                                                         | 713                 | 202953_at                                                               |
| HG-U133A_2HF12795          | DOCK5                               | NM_024940.6                                                                         | 80005               | 215185_at:219921_s_at                                                   |
| HG-U133A_2HF479            | NAB2                                | NM_005967.3                                                                         | 21800               | 212800_s_at:216017_s_at                                                 |
| HG-U133A_2HF8719           | ITGB8                               | NM_002214.2                                                                         | 3696                | 205816_at:211488_s_at                                                   |
| HG-U133A_2HF10099          | C6orf103                            | XM_929679.2:XM_941958.2                                                             | 79747               | 220614_s_at                                                             |
